# Supplementary material for: Study of the intermediate pyrolysis steps and mechanism identification of polymer-derived SiBCN ceramics
Source: Royal Society of Chemistry journal article supplement (doi:10.1039/c2jm32737f), 2012-01-01
Supplement: c2jm32737f.pdf [file c2jm32737f.pdf]

## Study of the Intermediate Pyrolysis Steps and Mechanism Identification of Polymer-Derived SiBCN Ceramics

Laura Gottardo<sup>a</sup>, Samuel Bernard<sup>a,b</sup>, Christel Gervais<sup>c</sup>, Markus Weinmann<sup>d</sup>, and Philippe Miele<sup>b</sup>

### Electronic Supplementary Information

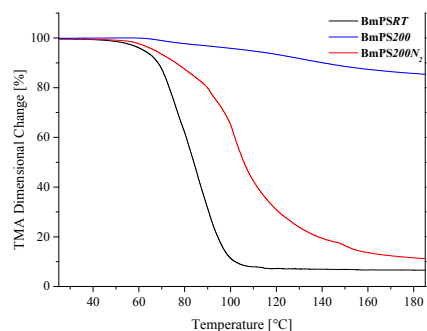

**Figure 1SI.** TMA curves recorded under nitrogen in the temperature range RT – 185 °C for samples **BmPSRT**, **BmPS200N<sub>2</sub>** after thermolysis to 200 °C in flowing nitrogen and **BmPS200**.

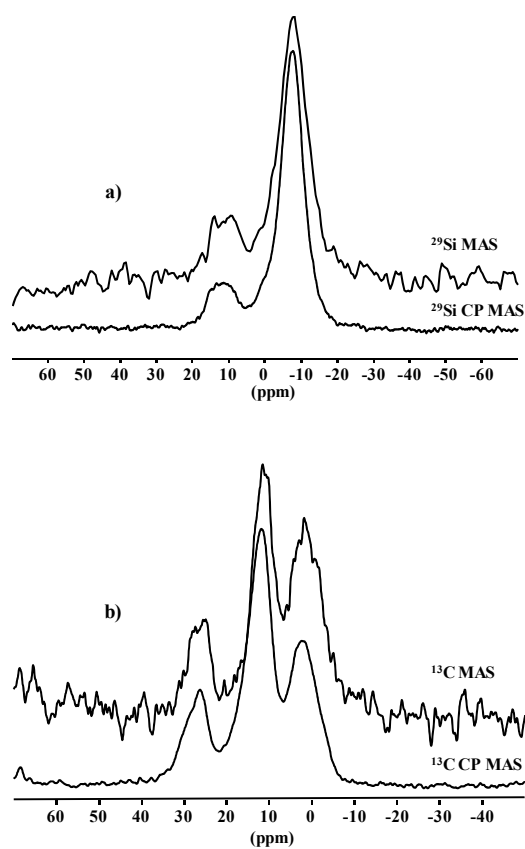

**Figure 2SI.** Effect of cross polarization on NMR spectra : a) <sup>29</sup>Si CP MAS and <sup>29</sup>Si MAS NMR spectra of **BmPS100** b) <sup>13</sup>C CP MAS and <sup>13</sup>C MAS NMR spectra of **BmPS100**

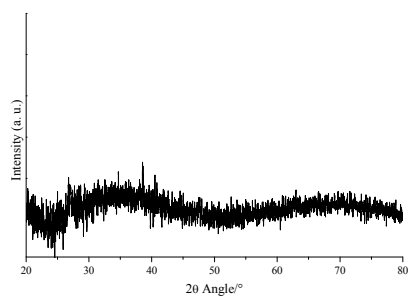

**Figure 3SI.** XRD pattern of **BmPS1000**.
